# Supplementary material for: Surface proton hopping conduction mechanism dominant polymer electrolytes created by self-assembly of bicontinuous cubic liquid crystals
Source: Royal Society of Chemistry journal article supplement (doi:10.1039/d4sc01211a), 2024-01-01
Supplement: d4sc01211a1.pdf [file d4sc01211a1.pdf]

## Supplementary Information

### Surface proton hopping conduction mechanism dominant polymer electrolytes created by self-assembly of bicontinuous cubic liquid crystals

Takahiro Ichikawa\*<sup>[a]</sup>, Takeshi Yamada\*<sup>[b]</sup>, Nanami Aoki<sup>[a],†</sup>, Yuki Maehara<sup>[a],†</sup>, Kaori Suda<sup>[a]</sup>, and Tsubasa Kobayashi<sup>[a]</sup>

Correspondence to: [t-ichi@cc.tuat.ac.jp](mailto:t-ichi@cc.tuat.ac.jp), [t\\_yamada@cross.or.jp](mailto:t_yamada@cross.or.jp)

#### 1. Materials and methods

##### 1.1. General

All the reagents were purchased from Sigma Aldrich and Tokyo Kasei corporation. All reactions were carried out under an argon atmosphere in anhydrous solvents. **GZ** was synthesized according to the literature.<sup>1</sup> <sup>1</sup>H and <sup>13</sup>C nuclear magnetic resonance (NMR) spectra were recorded on a JEOL model JNM-ECA 400 spectrometer operating at 400.00 MHz and 100.00 MHz for <sup>1</sup>H and <sup>13</sup>C NMR, respectively. The thermal properties of the compounds and the polymer films were examined using a differential scanning calorimeter (DSC-6220, Seiko Instruments). A polarizing optical microscope Olympus BX51 equipped with a Linkam LK-600 hot stage was used for observing the phase behavior.

##### 1.2. Preparation of Film-G

DMPA (2,2-Dimethoxy-2-phenylacetophenone) was selected as a photo-polymerization initiator. Homogeneous mixtures of **GZ**, HTf<sub>2</sub>N, and DMPA were prepared by dissolving requisite amounts of the three compounds in a chloroform/methanol mixed solvent and subsequent removal of the solvent. The molar ratio between **GZ** and HTf<sub>2</sub>N was controlled to be 1:0.5 while the weight ratio of DMPA was controlled to be 1.0 wt% against the total weight of **GZ** and HTf<sub>2</sub>N. 18.5 wt% of water was added to the mixture and kneaded with spatula to be homogeneous. The obtained homogeneous mixtures were sandwiched by a Teflon sheet and a transparent film with 100 μm thickness spacers. UV irradiation was performed for the mixtures for 2 h at 30 °C using a xenon lamp as a light source.

### 1.3. Characterization of Film-G

The characterization of **Film-G** was performed in our previous study.<sup>1</sup> In the present study, the presence of the gyroid nanostructure was also confirmed by the same ways using polarizing optical microscope observation and X-ray diffraction measurements (Fig. S1).

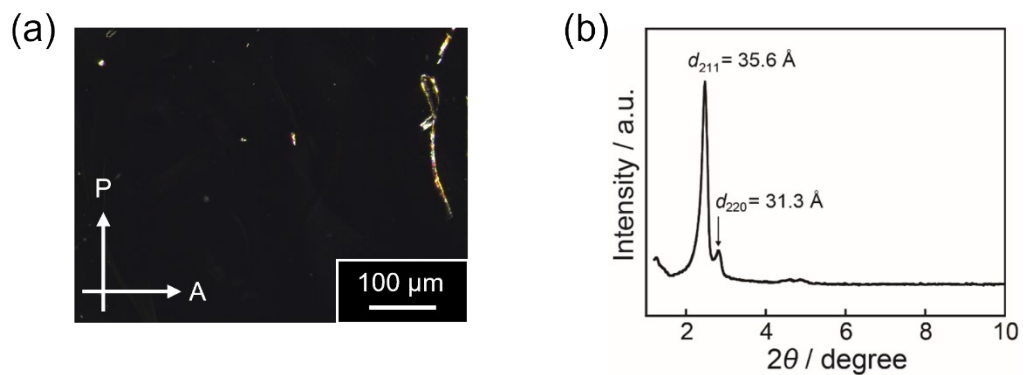

**Fig. S1.** (a) Polarizing optical microscope image of **Film-G** at 25 °C. (b) XRD pattern of **Film-G** at 25 °C. The observation of (211) and (220) reflections is indicative of the presence of a gyroid nanostructure.

#### 1.4. Impedance measurement

Alternating current impedance measurements were performed using a Schlumberger Solartron 1260 impedance analyzer (frequency range = 10 Hz to 10 MHz, applied voltage = 0.1 V). Two rod-shaped gold electrodes were used for measuring ionic conductivity perpendicular to the film surface (Fig. S2). This measurement gave the proton conductivity of **Film-G** in perpendicular directions to the film surface.

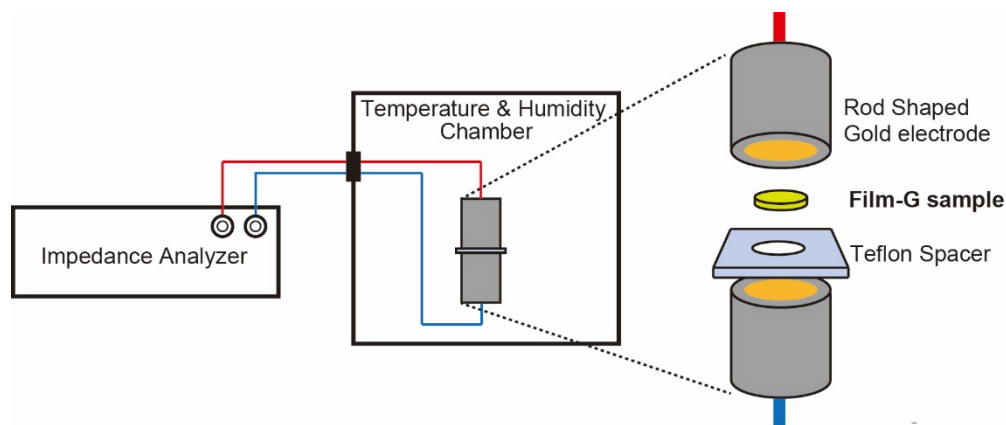

**Fig. S2.** Schematic representation of the electrical cell used for examining proton (ionic) conductivity.

The distance between the two electrodes ( $l$ ) is 0.24 [mm] and the **Film-G** surface area ( $A$ ) is  $3.14 \times 1.0 \times 1.0 = 3.14$  [mm<sup>2</sup>]. The cell constant value is  $l / A = 1/3.14 = 0.0764$  [mm<sup>-1</sup>] = 0.764 [cm<sup>-1</sup>], which was used for the calculation of  $\sigma_{H^+}$  values.

#### 1.5. Quasi elastic neutron scattering (QENS) measurements

QENS measurements were performed at the BL02-DNA near-back scattering spectrometer in Materials and Life Science Experimental Facility (MLF), J-PARC (Tokai, Japan).<sup>2,3</sup> The energy resolution was 3.6  $\mu$ eV with operating a pulse shaping chopper at 225Hz. The covered energy transfer and momentum transfer ranges are  $-40$  to 100  $\mu$ eV and 0.1 to 1.9  $\text{\AA}^{-1}$ , respectively. Four samples of **Film-G/3H<sub>2</sub>O**, **Film-G/3D<sub>2</sub>O**, **Film-G/6H<sub>2</sub>O**, and **Film-G/6D<sub>2</sub>O** were measured at 300, 280, 260, and 10 K. The data at 10 K were used for the resolution. The counting time was almost 5 hours with 700 kW of operating proton beam power.

## 2. Experimental section

### 2.1. Calculation of the distance of the $SO_3^-$ Sites ( $l_{SO_3^- - SO_3^-}$ )

By using  $L_{Cubic} = 9.69$  nm and the film density of  $1.20$  g  $cm^{-3}$  when the water content of **Film-G** is 16.4 wt% (Fig. S3),<sup>1</sup> the number of the **GZ** molecules in a cubic cell is calculated to be about 502 (Table. S1). Thus, about 1004 of the  $SO_3^-$  groups sit on a gyroid minimal surface (G-surface) in a cubic unit cell. The area of the G-surface in a cubic cell can be calculated from  $L_{Cubic}^2 \times 3.09 = 290$   $nm^2$  (Fig. S3).<sup>4</sup> By using these values and assuming that the  $SO_3^-$  groups are homogenously dispersed on the G-surface,  $l_{SO_3^- - SO_3^-}$  in **Film-G(16.4)** can be roughly estimated to be 5.8 Å (Fig. S4). This value is predominantly smaller than that of Nafion. This is a value for which one can expect the exhibition of ultrafast SPHC with very small  $E_a$ .

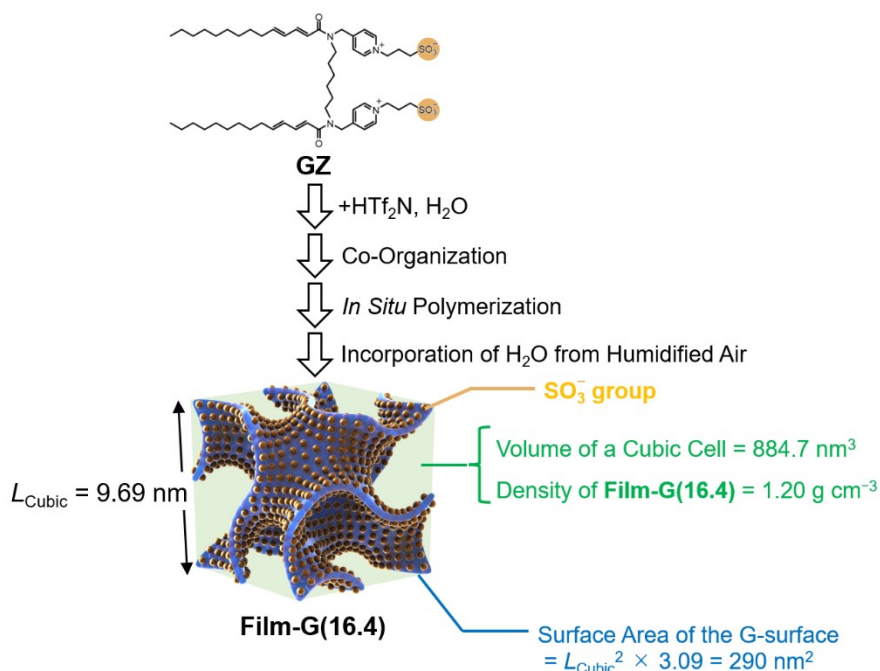

**Fig. S3.** The volume and density of a cubic cell in **Film-G(16.4)**. The surface area of G-surface is also shown.

**Table S1.** The weight of each component in a cubic cell and the number of component molecules in the cubic cell

|                                                        | <b>GZ</b>              | <b>HTf<sub>2</sub>N</b> | <b>H<sub>2</sub>O</b>  |
|--------------------------------------------------------|------------------------|-------------------------|------------------------|
| Molecular weight                                       | 955.37                 | 281.14                  | 18.02                  |
| Molar ratio                                            | 1                      | 0.5                     | 11.93                  |
| Percentage by weight                                   | 72.88                  | 10.72                   | 16.40                  |
| The weight of each component in a cubic unit cell (g)  | $7.96 \times 10^{-19}$ | $1.17 \times 10^{-19}$  | $1.79 \times 10^{-19}$ |
| The number of component molecules in a cubic unit cell | 502                    | 251                     | 5984                   |



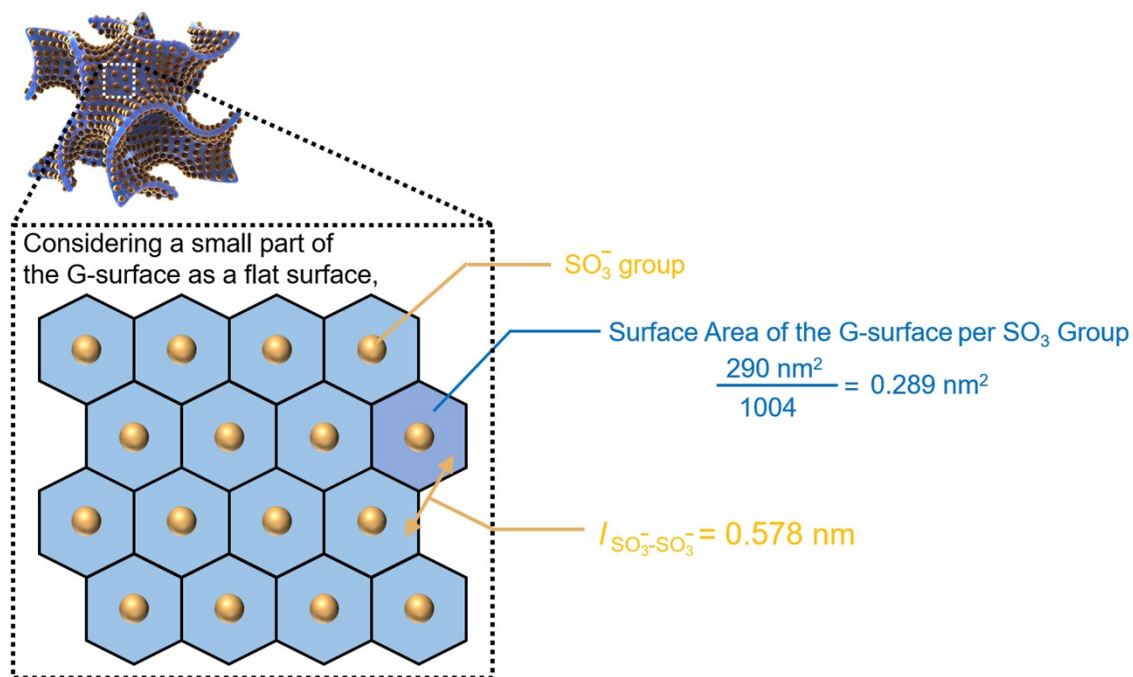

**Fig. S4.** Rough estimation of  $l_{SO_3^- - SO_3^-}$  with considering that a small part of the G-surface is a flat surface and the  $SO_3^-$  groups form a hexagonal distribution on the flat surface. For the estimation of  $l_{SO_3^- - SO_3^-}$ , the number of the  $SO_3^-$  groups on the G-surface and the area of the G-surface in a cubic cell is used.

## 2.2. Ionic conductivity of Film-G

Alternating current impedance measurements were performed for **Film-G** containing X wt % of water (X = 15.2, 9.9, and 6.0) at various temperature. Cole-Cole plots for **Film-G(X)** at 30 °C are shown in Fig. S5. The  $\sigma_{H^+}$  values were calculated using the cell constant value of 0.764 [cm<sup>-1</sup>] shown in page S3.

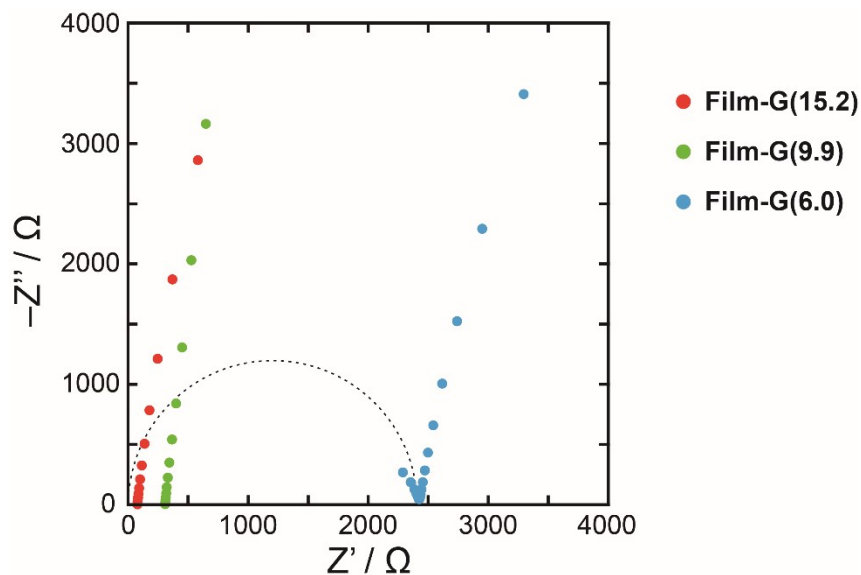

**Fig. S5.** Cole-Cole plots for **Film-G** containing X wt % of water (X = 15.2, 9.9, and 6.0) at 30 °C.

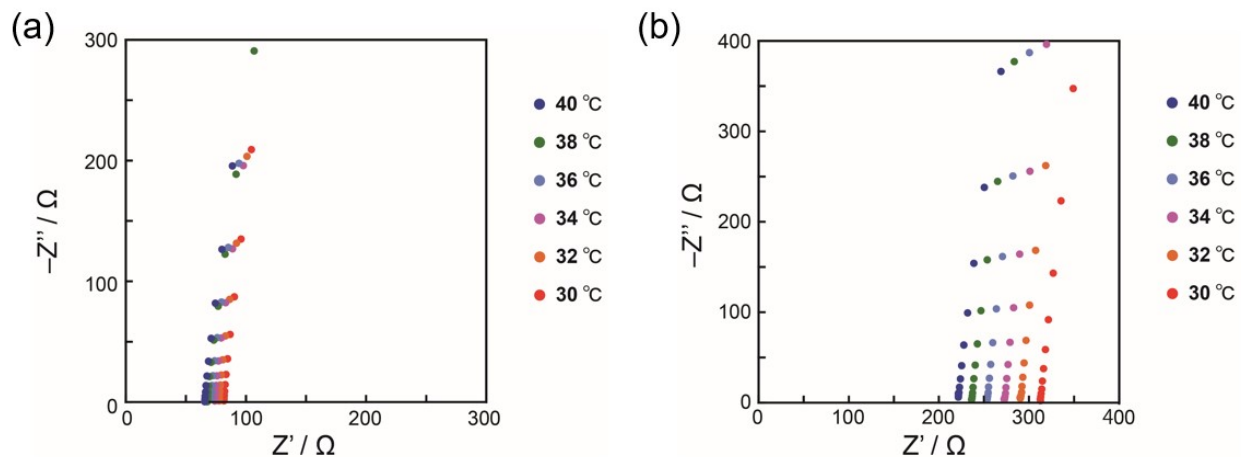

**Fig. S6.** (a) Cole-Cole plots for **Film-G** containing 15.2 wt % of water at various temperature. (b) Cole-Cole plots for **Film-G** containing 9.9 wt % of water at various temperature.

To examine the temperature dependence of  $\sigma_{H^+}$  is a useful strategy for evaluating the apparent activation energy ( $E_a$ ) of proton conductive materials. In the case of Nafion, it is generally understood that experimentally obtained  $E_a$  values for wet Nafion are largely related with solvent-re-organization energy while those obtained for highly-dried Nafion are attributed to a large electrostatic potential barrier that the protons on the surface have to overcome. We examined the temperature dependence of the ionic conductivity ( $\sigma$ ) for **Film-G(X)**. The  $\sigma$  values were measured using two rod-shaped gold electrodes. Since the dominant carrier ion in **Film-G(X)** is  $H^+$ , we approximated  $\sigma_{H^+}$  with  $\sigma$ . The logarithm of the obtained  $\sigma_{H^+}$  values are plotted against the reciprocal of absolute temperature. The activation energy ( $E_a$ ) was estimated from the slope of the plots in the lower temperature range of 30-40 °C in order to suppress the possibility of the evaporation of the absorbed water.

## 2.3. Estimation of various parameters

### 2.3.1. Estimation of $\varepsilon_i$ (volume fraction occupied by water)

The volume fraction occupied by water,  $\varepsilon_i$ , was estimated as below. Firstly, we examined the change of the volume of a cubic unit cell before and after water absorption. The cubic lattice length was evaluated from X-ray diffraction results in our previous study.<sup>1</sup> The difference of the volume of the unit cell between **Film-G(16.4)** and **Film-G(1.2)** was  $9.69^3 \text{ nm}^3 - 8.97^3 \text{ nm}^3$  (Fig. S7). By dividing this value with  $9.69^3 \text{ nm}^3$ , the volume percentage where water occupy was calculated to be 20.6 %. This value is comparable to the increase of the water content weight ratio (16.4 – 1.2 = 15.2 wt%). These results suggest that  $\varepsilon_i$  (%) can be approximated by the water content X value.

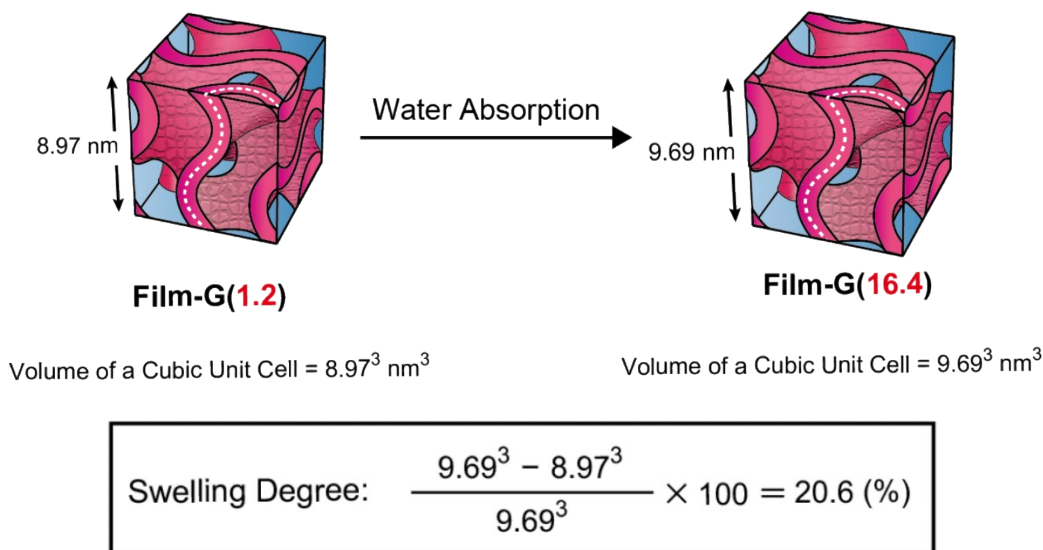

**Fig. S7.** The difference of the volume of a cubic unit cell before and after water absorption that is calculated from the cubic lattice length obtained from X-ray diffraction measurements.<sup>1</sup>





### 2.3.2. Estimation of $C_{H^+}^\Sigma$ (concentration of proton)

It is assumed that the density of the 3D water nanosheet on the gyroid minimal surface is not far from that of bulk water. Therefore, we consider it as  $1 \text{ g cm}^{-3}$ . Based on this idea, concentration of proton,  $C_{H^+}^\Sigma$ , can be evaluated from the number of water molecules per  $H^+$  in the 3D water nanosheet (Table S2). The number of  $H^+$  is calculated by assuming that all of  $HTf_2N$  molecules in **Film-G** are in the dissociated state. Comparing the molar ratio of  $H^+$  and  $H_2O$  in **Film-G(15.2)** with that in a 1 M of an acid solution (Table S3), the concentration of proton in the 3D water nanosheet in **Film-G(15.2)** can be calculated to be 2.54 (M) as below.

$$\frac{55.49}{10.90} \times 0.5 = 2.54 \text{ (M)}$$

**Table S2.** The molar ratio of **GZ**,  $HTf_2N$ , and  $H_2O$  in **Film-G(15.2)**

|                  | <b>GZ</b> | $HTf_2N$ | $H_2O$ |
|------------------|-----------|----------|--------|
| Molecular Weight | 955.37    | 281.14   | 18.02  |
| Molar Ratio      | 1.00      | 0.50     | 10.90  |

**Table S3.** The molar ratio of  $H_2O$  and  $H^+$  in a 1 M of an acid solution

|                                  | $H_2O$ | $H^+$ |
|----------------------------------|--------|-------|
| Molecular Weight                 | 18.02  | 1.00  |
| Mole in a 1L acid solution (1 M) | 55.49  | 1.00  |
| Molar Ratio                      | 55.49  | 1.00  |

### 2.3.4. Estimation of $l_\Sigma$ (hopping length)

In the case of conventional Grotthuss mechanism,  $l_\Sigma$  is usually considered to be 0.255 nm based on the O-O distance in the hydrated proton forms. In the present study, we propose a SPHC conduction model shown in Fig. 3d where  $H^+$  moves 0.59 nm via two hops. Therefore, it is reasonable to consider  $l_\Sigma$  as the half of 0.59 nm, namely 0.295 nm.

### 2.3.5. Estimation of $\theta$ (tortuosity)

Tortuosity ( $\theta$ ) of proton conduction pathways usually depends on the volume fraction occupied by water ( $\epsilon_i$ ). Estimation methods for  $\theta$  have been proposed by several groups.<sup>5-7</sup> For example, in the case of general polymer electrolytes, it can be predicted by using percolation theory.<sup>8,9</sup> However, in the case of **Film-G**, the proton conduction pathway is formed along a G-surface that continues in XYZ directions infinitely, meaning that there is no need to apply percolation theory. Our idea for estimating  $\theta$  in **Film-G** is that it is roughly estimated by calculating the ratio of the curve length along a sine curve against the cubic lattice length, which is  $7.64/2\pi = 1.21$  (Fig. S8).

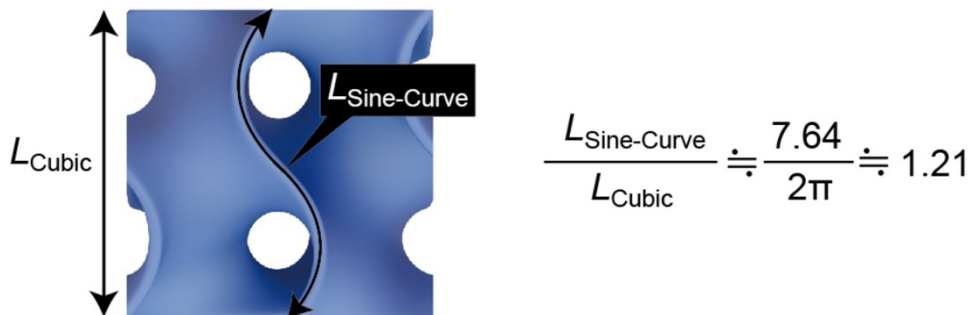

**Fig. S8.** The tortuosity ( $\theta$ ) of a gyroid minimal surface.

### 2.3.6. Estimation of $\kappa$ (a constant value that depends on the dimensionality of random walk)

$\kappa$  is a constant value that depends on the dimensionality of random walk. It can be regarded as 2, 4, or 6 for a one-, two-, or three-dimensional walk, respectively. In the case of 2D nanochannel models, proton hops from a  $\text{SO}_3^-$  site to a neighboring water molecule in a direction perpendicular to the hydrophobic walls are thermodynamically unfavorable because the proton receives cooperative electrostatic attractions from several nearby  $\text{SO}_3^-$  sites. Therefore, proton hops along the hydrophobic wall toward a neighboring  $\text{SO}_3^-$  site are much more feasible, indicating that it is reasonable to assume  $\kappa$  as 4 (Fig. S9).

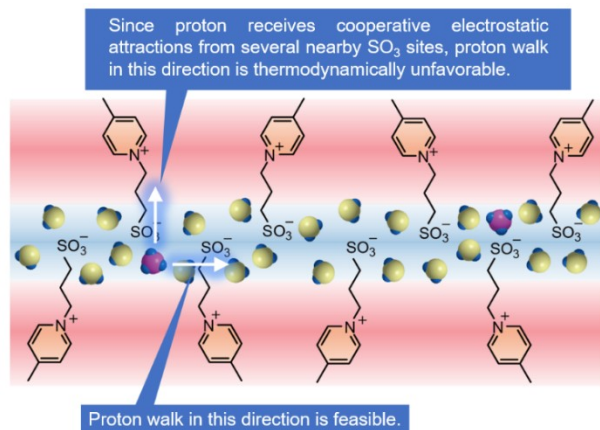

**Fig. S9.** Dimensionality of proton walk on a gyroid minimal surface in **Film-G**.

### 2.3.7. Estimation of $\Delta G_{\Sigma}^{e,0}$ (the effective Gibbs free energy of activation)

Assuming that the proton conduction in Film-G is dependent solely on surface proton hopping conduction mechanism,  $\Delta G_{\Sigma}^{e,0}$  in **Film-G(X)** was estimated based on the experimentally-obtained  $\sigma_{H^+}$  values at 30 °C and the various parameters summarized in Table S4. The estimated  $\Delta G_{\Sigma}^{e,0}$  values are summarized in Table. S5. They are compared with  $E_a$  values. It was found that there is a large difference between the estimated  $\Delta G_{\Sigma}^{e,0}$  values and  $E_a$  values while the difference becomes small as the increase of the water content X. It can be explained by the change of the surface proton hopping conduction mechanism as shown in Fig. 3a-d. The difference between the  $\Delta G_{\Sigma}^{e,0} = 13.3$  kJ mol<sup>-1</sup> and  $E_a = 17.2$  kJ mol<sup>-1</sup> can be explained as below. When estimating the  $E_a$  values, the relative humidity was controlled to be 90%. As the increase of temperature, the absolute humidity increases, which leads to a slight increase of the water content in **Film-G(15.2)**. Therefore, the slope in the Arrhenius plot appears as a slightly-larger value than the exact activation energy. Therefore, the slight difference is acceptable and reasonable.

**Table S4.** Various parameters that are used for the calculation of  $\Delta G_{\Sigma}^{e,0}$

| Parameter                                  | Value                      | Unit                                |
|--------------------------------------------|----------------------------|-------------------------------------|
| $v_0 = \frac{k_B T}{h}$                    | $6.418 \times 10^{12}$     | s <sup>-1</sup>                     |
| $h$                                        | $6.626070 \times 10^{-34}$ | m <sup>2</sup> kg s <sup>-1</sup>   |
| $k_B$                                      | $1.380649 \times 10^{-23}$ | J K <sup>-1</sup>                   |
| $T$                                        | 303                        | K                                   |
| Avogadro constant $N_A$                    | $6.02214 \times 10^{23}$   | mol <sup>-1</sup>                   |
| $l_{\Sigma}$                               | 0.295                      | nm                                  |
| $\kappa$                                   | 4                          | dimensionless                       |
| $\varepsilon_i$                            | 0.164                      | dimensionless                       |
| $\theta$                                   | 1.21                       | dimensionless                       |
| $F$                                        | 96485                      | C mol <sup>-1</sup>                 |
| $R$                                        | 8.314                      | J K <sup>-1</sup> mol <sup>-1</sup> |
| $T$                                        | 303                        | K                                   |
| $C_{H^+}^{\Sigma}$ (mol/L)                 | 2.326                      | mol L <sup>-1</sup>                 |
| $C_{H^+}^{\Sigma}$ (mol cm <sup>-3</sup> ) | $2.326 \times 10^{-3}$     | mol cm <sup>-3</sup>                |

**Table S5.** Activation energy and ionic conductivity of **Film-G** containing X wt% of water

|                     | $\sigma_{H^+}$ at 30 °C<br>(S cm <sup>-1</sup> ) | Estimated $\Delta G_{\Sigma}^{e,0}$<br>(kJ mol <sup>-1</sup> ) | $E_a$ values (kJ mol <sup>-1</sup> ) |
|---------------------|--------------------------------------------------|----------------------------------------------------------------|--------------------------------------|
| <b>Film-G(6.0)</b>  | $5.37 \times 10^{-4}$                            | 20.4                                                           | 35.3                                 |
| <b>Film-G(9.9)</b>  | $2.21 \times 10^{-3}$                            | 16.8                                                           | 27.1                                 |
| <b>Film-G(15.2)</b> | $8.45 \times 10^{-3}$                            | 13.3                                                           | 17.4                                 |

### 2.3.8. Estimation of $\Delta\tau_{D(App)}^{\Sigma}$ (mean jump time for a proton hop)

$\tau_{D(App)}^{\Sigma}$  of **Film-G(15.2)** at various temperatures were calculated using the value of  $\Delta G_{\Sigma}^{e,0} = 13.3 \text{ kJ/mol}$  (Table S6).

**Table S6.**  $\tau_{D(App)}^{\Sigma}$  of **Film-G(15.2)** at various temperatures

| Temperature (K) | $\tau_{D(App)}^{\Sigma}$ (s) |
|-----------------|------------------------------|
| 300             | $32.5 \times 10^{-12}$       |
| 280             | $50.9 \times 10^{-12}$       |
| 260             | $84.9 \times 10^{-12}$       |
| 240             | $153.3 \times 10^{-12}$      |

## 2.4. Characterization of the state of water molecules in Film-G

### 2.4.1. Our assumption on the existence position of water molecules

Here we note that the zwitterion part of **GZ** has an ability to form ion exchange with  $\text{HTf}_2\text{N}$  according to the hard and soft, acids and bases principle.<sup>10</sup> Therefore, the molecular assembled nanostructures of the mixture of **GZ**/ $\text{HTf}_2\text{N}$ /water before and after polymerization are expected to be as illustrated in Fig. S10. Since the combination of the pyridinium cation and the  $\text{Tf}_2\text{N}$  anion is a representative ion pair that forms hydrophobic ionic liquids, it is expected that the most of the water molecules locate at around the  $\text{SO}_3^-$  groups.

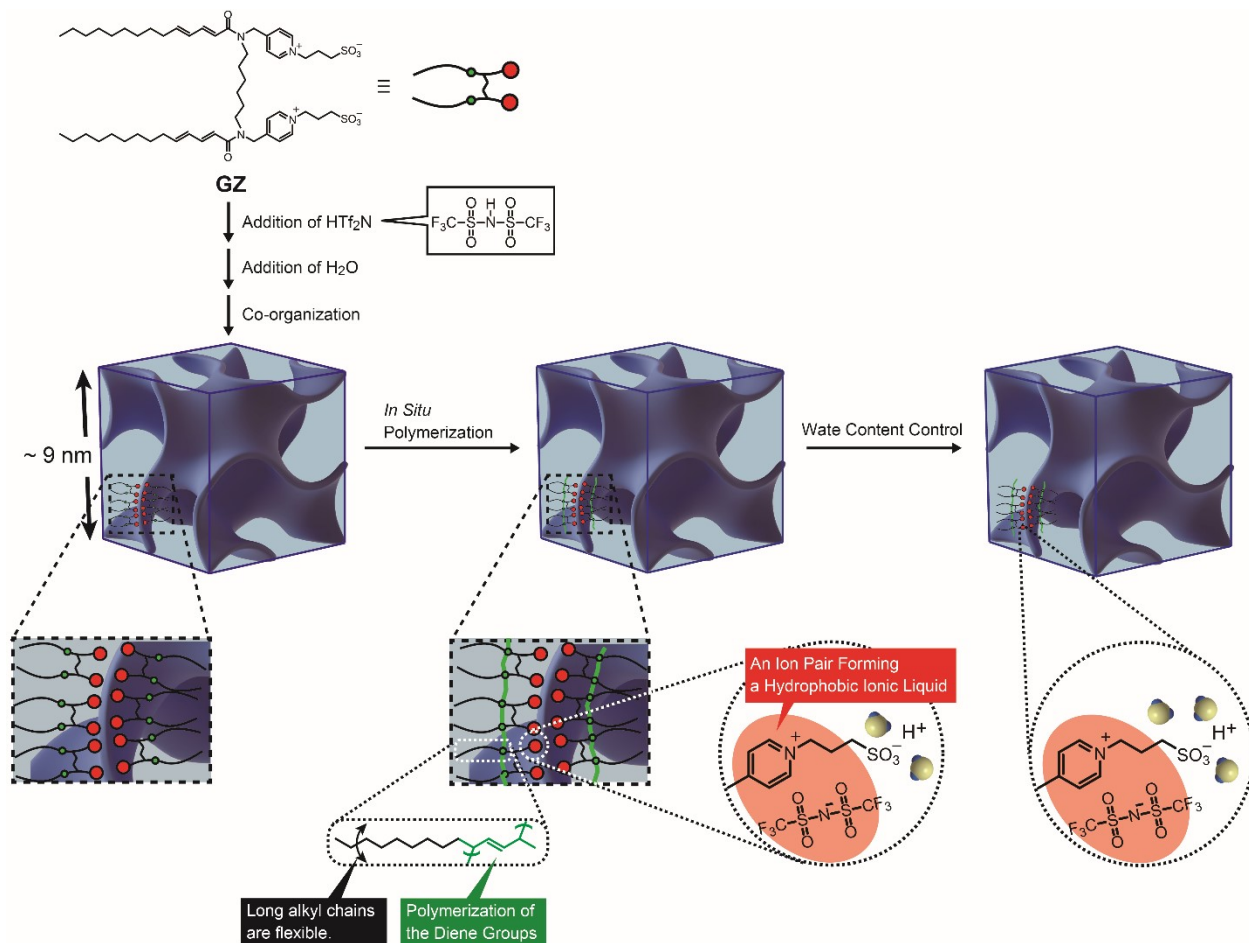

**Fig. S10.** A schematic illustration of the molecular assembled nanostructure of **GZ** in the presence of  $\text{HTf}_2\text{N}$  and water.

### 2.4.2. State of water molecules in Film-G(X)

DSC measurements were performed for **Film-G(X)** containing various water content  $X$ . The heating and cooling rates were  $5\text{ }^\circ\text{C min}^{-1}$ . The data on cooling are shown in Fig. 5 while those on heating are shown in Fig. S11. It was found that **Film-G(X)** show no exothermic and endothermic peak on heating when  $X \leq 15.6$ . These results indicate that all of the water molecules in the film exist as non-freezing bound water when  $X \leq 15.6$ . It is mainly attributed to the strong hydration

ability of the  $SO_3^-$  groups although a part of the water molecules is expected to interact with the other ionic species, such as the pyridinium cations of **GZ** and the  $Tf_2N^-$  anion of  $HTf_2N$ .

On the other hand, when  $X \geq 17.3$ , some exothermal and endothermal peaks were found for **Film-G(X)** on heating. For example, **Film-G(17.3)** shows an exothermic and an endothermic peaks on heating. The exothermic peak corresponds to a cold crystallization. Generally, it is expected that the water molecules in this kind of polymer electrolytes can be classified into three classes, free water, freezing bound water, and non-freezing bound water. The numbers of water molecules in each class were calculated as shown in Table S7. For the calculation of the number of freezing bound water per **GZ**, the enthalpy of water melting ( $334 \text{ J g}^{-1}$ ) was used. It can be seen that the number of non-freezing bound water per **GZ** is lower than 13, namely the number of non-freezing bound water per  $SO_3^-$  group is lower than 6.5. Considering the general insights that these ionic groups have ability to catch about 7 water molecules as bound water,<sup>11</sup> our conclusion can be considered to be objectively valid.

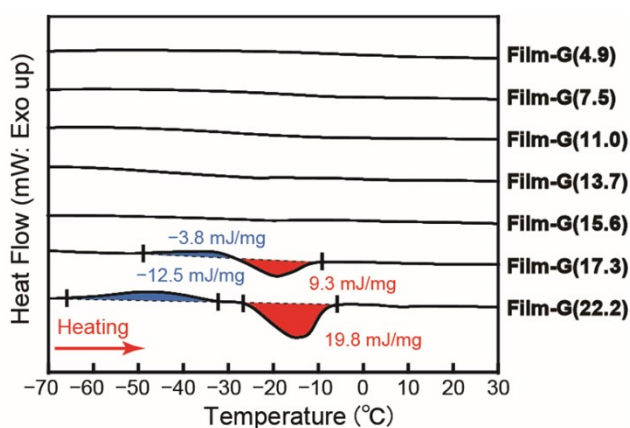

**Fig. S11.** DSC thermograms of **Film-G(X)** on heating.

**Table S7.** Molar ratio of **GZ** :  $HTf_2N$  :  $H_2O$  in **Film-G** and the numbers of free water, freezing bound water, and non-freezing bound water per **GZ**

|                     | Molar ratio of <b>GZ</b> : $HTf_2N$ : $H_2O$ | Number of free water per <b>GZ</b> | Number of freezing bound water per <b>GZ</b> | Number of non-freezing bound water per <b>GZ</b> |
|---------------------|----------------------------------------------|------------------------------------|----------------------------------------------|--------------------------------------------------|
| <b>Film-G(4.9)</b>  | 1 : 0.5 : 3.1                                | 0                                  | 0                                            | 3.1                                              |
| <b>Film-G(7.5)</b>  | 1 : 0.5 : 4.9                                | 0                                  | 0                                            | 4.9                                              |
| <b>Film-G(11.0)</b> | 1 : 0.5 : 7.5                                | 0                                  | 0                                            | 7.5                                              |
| <b>Film-G(13.7)</b> | 1 : 0.5 : 9.7                                | 0                                  | 0                                            | 9.7                                              |
| <b>Film-G(15.6)</b> | 1 : 0.5 : 11.2                               | 0                                  | 0                                            | 11.2                                             |
| <b>Film-G(17.3)</b> | 1 : 0.5 : 12.8                               | 0                                  | 2.0                                          | 10.7                                             |
| <b>Film-G(22.2)</b> | 1 : 0.5 : 17.4                               | 0                                  | 4.6                                          | 12.7                                             |

### 3. QENS experiments

#### 3.1.1. Preparation of samples for QENS experiments

The precise estimation of the water contents in the samples for QENS experiment is quite important for precise analysis. In order to estimate the water content in the samples, we took the process as explained in Fig. S12. As an example, we explain the case for **Film-G** containing H<sub>2</sub>O. First, we prepared four of circle-shaped **Film-G** samples whose weight is about 10-13 mg. The total weight is about 50 mg, which changes depending on relative humidity. In order to obtain the weight of the samples without water, we dried the samples in vacuum. The weight of the four films in the driest state is 46.24 mg. The dried films were placed under a H<sub>2</sub>O-humidified condition. The samples were took out when the total weight of the four films reached 50.80 mg. The water content in the films was calculated to be 4.56 mg. As well as the **Film-G** samples containing H<sub>2</sub>O, those containing D<sub>2</sub>O were prepared in the same procedure. The calculation of the molar ratio is explained in 3.2. in the next page.

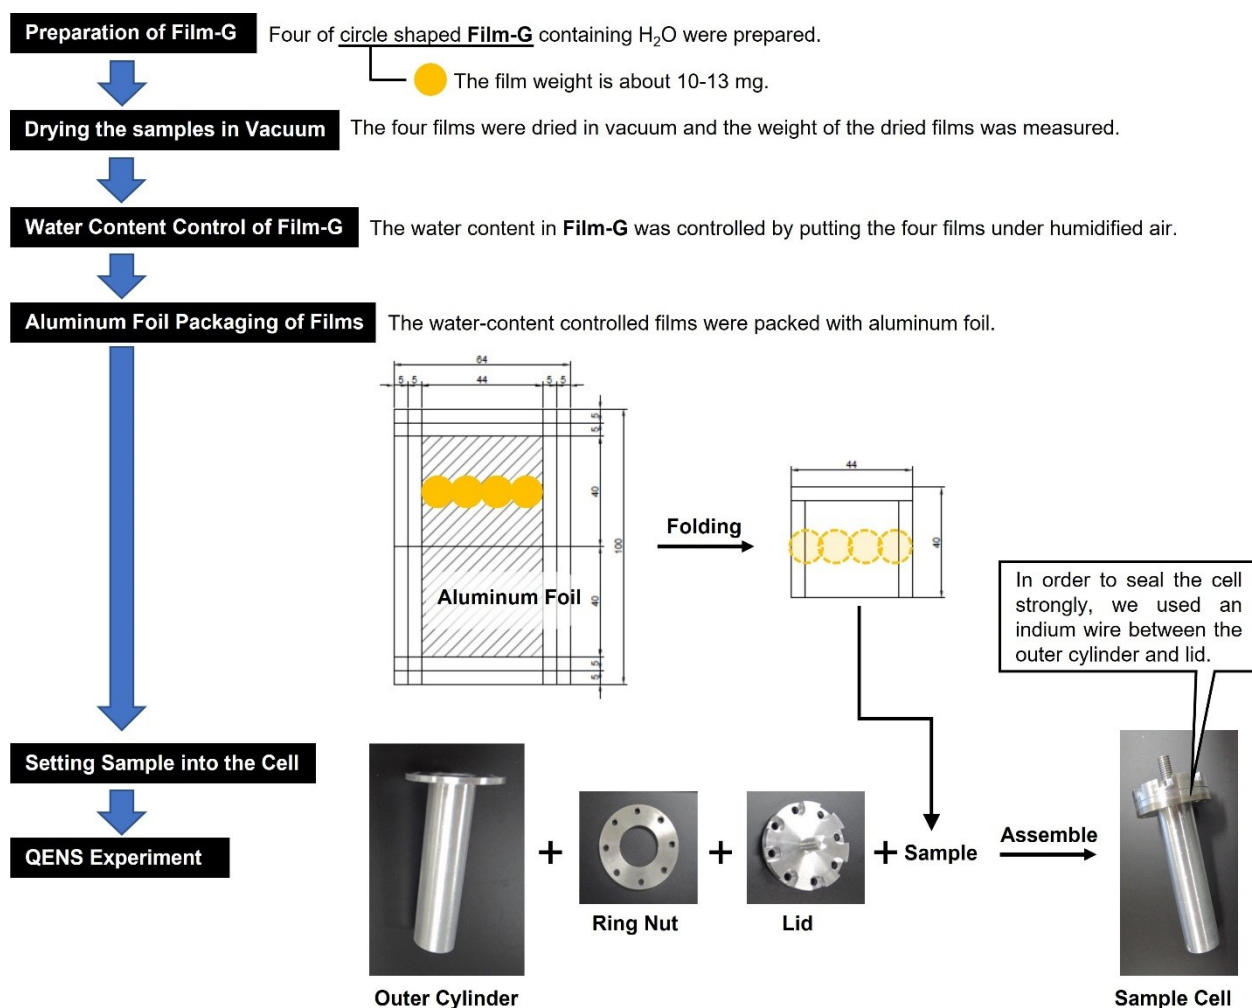

**Fig. S12.** Preparation procedure of the samples for QENS experiment. **Film-G** containing H<sub>2</sub>O was prepared according to the procedure. **Film-G** containing D<sub>2</sub>O was also prepared in the same way.



### 3.1.2. Details of samples

Calculation of the molar ratio of **GZ**, HTf<sub>2</sub>N, and H<sub>2</sub>O in **Film-G** was carried out as summarized in Table S8 and Table S9. The total weight of four of circle shaped **Film-G** containing H<sub>2</sub>O is 50.80 mg (Table S8). The molar ratio of **GZ**, HTf<sub>2</sub>N, and H<sub>2</sub>O is calculated to be 1.00:0.50:6.00 (Table S9), indicating that there are about 6 water molecules per **GZ** molecule (3 water molecules per zwitterion).

**Table S8.** Water content in **Film-G** containing H<sub>2</sub>O

|                                                                | <b>Film-G</b> containing H <sub>2</sub> O |
|----------------------------------------------------------------|-------------------------------------------|
| Total weight of <b>Film-G</b> containing H <sub>2</sub> O (mg) | 50.80                                     |
| Weight of <b>Film-G</b> in a highly dried state (mg)           | 46.24                                     |
| Weight of H <sub>2</sub> O in <b>Film-G</b> (mg)               | 4.56                                      |
| Water content in <b>Film-G</b> (wt%)                           | 8.98                                      |

**Table S9.** The molar ratio of **GZ**, HTf<sub>2</sub>N, and H<sub>2</sub>O

|                               | <b>GZ</b> | HTf <sub>2</sub> N | H <sub>2</sub> O | Total |
|-------------------------------|-----------|--------------------|------------------|-------|
| Weight of each component (mg) | 40.31     | 5.93               | 4.56             | 50.80 |
| Molecular Weight              | 955.37    | 281.14             | 18.02            | -     |
| Mole of each component (mmol) | 0.0422    | 0.0211             | 0.253            | -     |
| Molar Ratio                   | 1         | 0.50               | 6.00             | -     |

### 3.2.2. Characterization of **Film-G** containing 3D<sub>2</sub>O

Calculation of the molar ratio of **GZ**, HTf<sub>2</sub>N, and D<sub>2</sub>O in **Film-G** was carried out as summarized in Table S10 and Table S11. The total weight of four of circle shaped **Film-G** containing D<sub>2</sub>O is 53.00 mg (Table S10). The molar ratio of **GZ**, HTf<sub>2</sub>N, and D<sub>2</sub>O is calculated to be 1.00:0.50:5.95 (Table S11), indicating that there are about 6 water molecules per **GZ** molecule (3 water molecules per zwitterion).

**Table S10.** Water content in **Film-G** containing D<sub>2</sub>O

|                                                                | <b>Film-G</b> containing D <sub>2</sub> O |
|----------------------------------------------------------------|-------------------------------------------|
| Total weight of <b>Film-G</b> containing D <sub>2</sub> O (mg) | 53.00                                     |
| Weight of <b>Film-G</b> in a highly dried state (mg)           | 47.80                                     |
| Weight of D <sub>2</sub> O in <b>Film-G</b> (mg)               | 5.20                                      |
| Water content in <b>Film-G</b> (wt%)                           | 9.81                                      |

**Table S11.** The molar ratio of **GZ**, HTf<sub>2</sub>N, and D<sub>2</sub>O

|                               | <b>GZ</b> | HTf <sub>2</sub> N | D <sub>2</sub> O | Total |
|-------------------------------|-----------|--------------------|------------------|-------|
| Weight of each component (mg) | 41.67     | 6.13               | 5.20             | 53.00 |
| Molecular Weight              | 955.37    | 281.14             | 20.03            | -     |
| Mole of each component (mmol) | 0.0436    | 0.0218             | 0.259            | -     |
| Molar Ratio                   | 1         | 0.50               | 5.95             | -     |

### 3.1.3. Details of samples

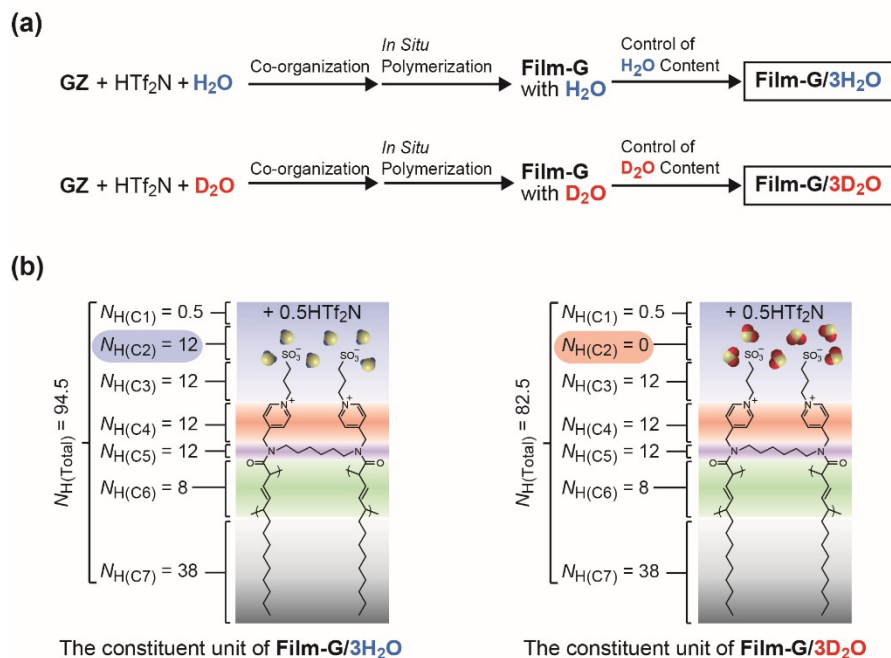

**Fig. S13.** (a) Preparation schemes for the two types of **Film-G** containing H<sub>2</sub>O or D<sub>2</sub>O. The co-organization of **GZ**, HTf<sub>2</sub>N, and H<sub>2</sub>O (or D<sub>2</sub>O) and the subsequent *in situ* polymerization yielded **Film-G** containing a certain amount of H<sub>2</sub>O or D<sub>2</sub>O. Since the water contents slightly change during the polymerization process, the water contents were controlled after the polymerization by drying in a vacuum and subsequent gradual absorption of a controlled amount of water (H<sub>2</sub>O or D<sub>2</sub>O) from humidified air. (b) The numbers of the hydrogen atoms ( $N_{\text{H}(C_m)}$ ) in each class of the constituent units of **Film-G/3H<sub>2</sub>O** and **Film-G/3D<sub>2</sub>O**.

Two types of **Film-G** samples containing H<sub>2</sub>O or D<sub>2</sub>O were prepared according to the scheme shown in Fig. S13a. The water contents in the samples were adjusted to be about 9.0 and 9.8 wt%, respectively, by putting them under controlled relative humidity conditions. Both of the resultant polymer films contain 3.0 water molecules (H<sub>2</sub>O or D<sub>2</sub>O) per zwitterion part. Below they are described as **Film-G/3H<sub>2</sub>O** and **Film-G/3D<sub>2</sub>O**, respectively. Taking into account the constituent unit of **Film-G/3H<sub>2</sub>O** is comprised of 1.0**GZ**, 0.5**HTf<sub>2</sub>N**, and 6H<sub>2</sub>O molecules, we roughly classify the hydrogen atoms in the constituent unit into 7 classes as shown in Fig. S13b. For example, the numbers of hydrogen atoms in each class of **Film-G/3H<sub>2</sub>O** ( $N_{\text{H}(C_m)}$ ,  $m = 1-7$ ) are 0.5, 12, 12, 12, 12, 8, and 38 in this order. The total of hydrogen atoms ( $N_{\text{H}(\text{Total})}$ ) is 94.5. Based on the number of the hydrogen atoms in these classes, we discuss the QENS results in the following paragraphs.

### 3.2. Analysis of QENS results

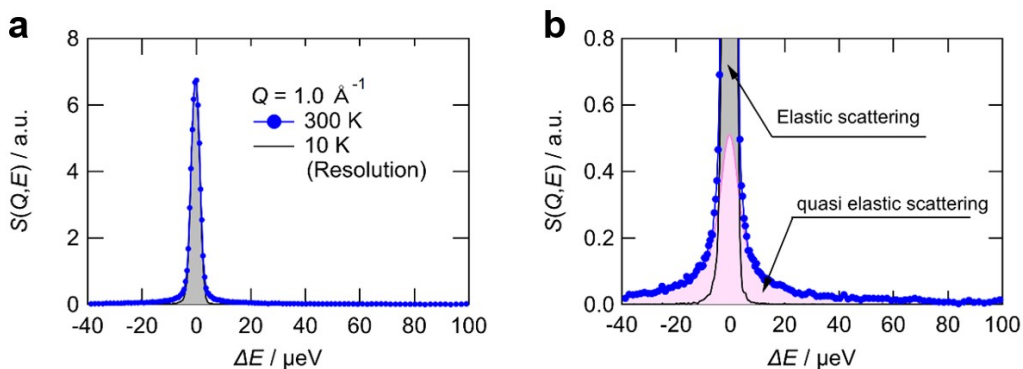

**Fig. S14.** **a**, QENS profiles of **Film-G/3H<sub>2</sub>O** at  $Q = 1.0 \text{ \AA}^{-1}$  at 300 K (blue circles) and 10 K (gray shaded part). **b**, 10 time magnification of y-axis of [a].

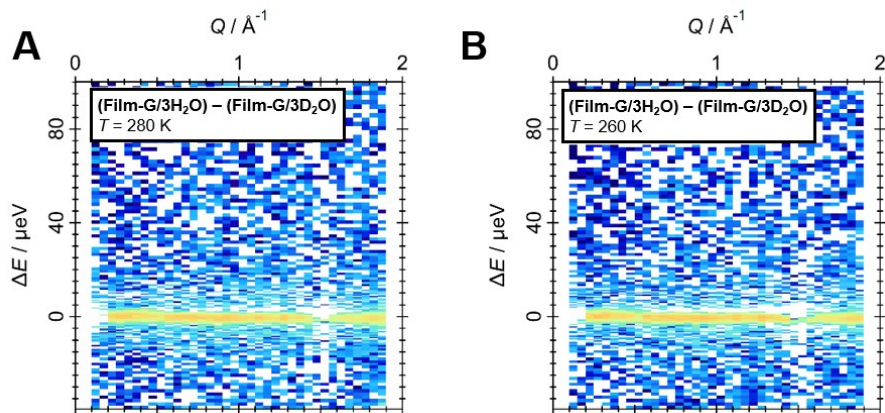

**Fig. S15.** The differential counter maps between **(Film-G/3H<sub>2</sub>O)** and **(Film-G/3D<sub>2</sub>O)** at 280 K (left) and 260 K (right). The white parts corresponding to negative values appeared at around  $\Delta E = 0$ .

### 3.3. Detailed analysis of QENS results

As mentioned in the main text, QENS profile of **Film-G/3D<sub>2</sub>O** reflects the dynamics of **Film-G** under the hydrated state because the D<sub>2</sub>O hardly influence the QENS profile due to the much smaller incoherent scattering cross section of deuterium than that of hydrogen. The QENS data shown in Fig. 6b (**Film-G/3D<sub>2</sub>O**) was divided into 12 QENS profiles with width of 0.15 Å<sup>-1</sup>. The profiles were well reproduced by Eq. 6 with two Lorentz function ( $n = 2$ ). Three examples of the 12 profiles are as shown in Fig. S16. The half width at half-height (HWHM) of the Lorentzian components ( $\Gamma_1$ : filled squares,  $\Gamma_2$ : open squares) in  $L_1(\Gamma_1, E)$  and  $L_2(\Gamma_2, E)$  are plotted against  $Q$  (Fig. S17). These values are almost constant to the  $Q$  values. Thus, the observed motions are due to local motion in **Film-G**.

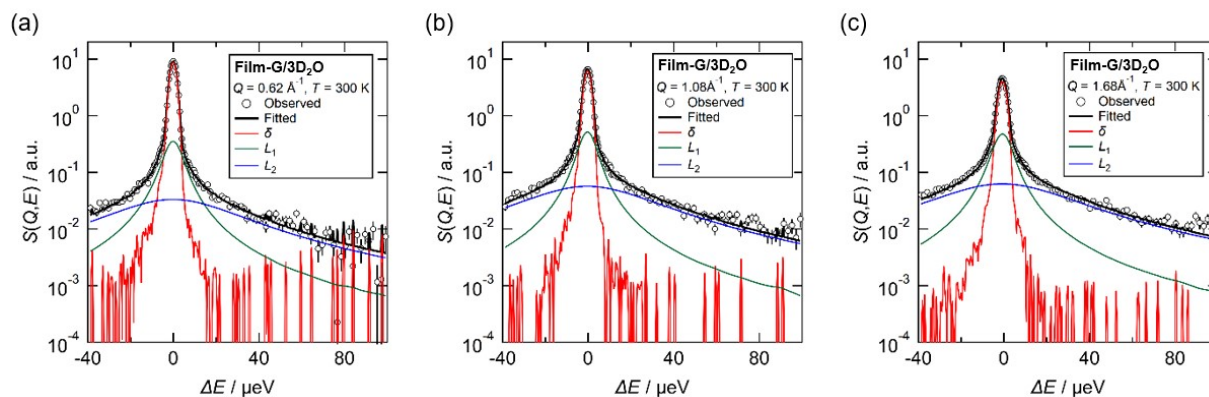

**Fig. S16.** QENS profiles of **Film-G/3D<sub>2</sub>O** at (a)  $Q = 0.62$ ; (b)  $Q = 1.08$ ; and (c)  $Q = 1.68$  Å<sup>-1</sup> at 300 K.

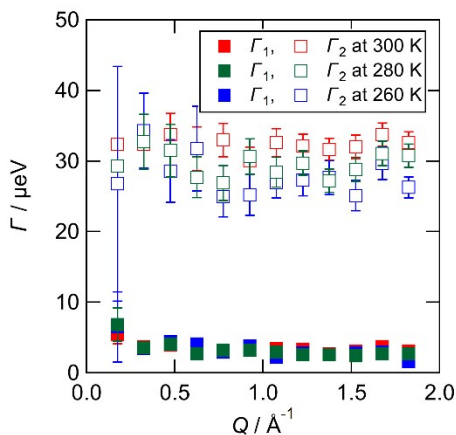

**Fig. S17.** The half width at half-height maximum (HWHM) of the Lorentzian components ( $\Gamma_1$ : filled squares,  $\Gamma_2$ : open squares) in  $L_1(\Gamma_1, E)$  and  $L_2(\Gamma_2, E)$  versus  $Q$  for **Film-G/3D<sub>2</sub>O** at 300 (red), 280 (green), and 260 K (blue).

Elastic incoherent scattering factors (EISFs)<sup>12</sup> were calculated using the obtained  $A_0$ ,  $A_1$ , and  $A_2$  values as follows,

$$EISF = \frac{A_0}{A_0 + A_1 + A_2}$$

The obtained EISFs were plotted against  $Q$  (Fig. S18). The EISFs were approached to unity at  $Q \rightarrow 0$  and it is also characteristics of local mode. The EISF at  $Q = 1.82 \text{ \AA}^{-1}$  at 300K suggest that about 55 % of the hydrogen atoms exist as the elastic components while the remain (45 %) is dynamic (Fig. S18). Considering that the number of the hydrogen atoms in the long alkyl chain parts,  $N_{H(C7)}$ , is 38, which corresponds to 46 % of the whole ( $N_{H(Total)} = 82.5$ ) (Fig. S13b), it is reasonable to assume that the two quasi elastic components,  $A_1$  and  $A_2$ , is mostly attributed to the long alkyl chain parts in **Film-G**. The EISF increased and the  $\Gamma_2$  decreased with decreasing temperature. It could be due to the slowing down of the alky chain, so that some QENS parts changed into the elastic. In this analysis, the dynamics of the alkyl chain is simplified by two relaxational components while it could be more complex. As a result, the analysis may catch characteristic modes in the measured energy transfer window, and temperature dependence of the width ( $\Gamma_1$ ) was not observed.

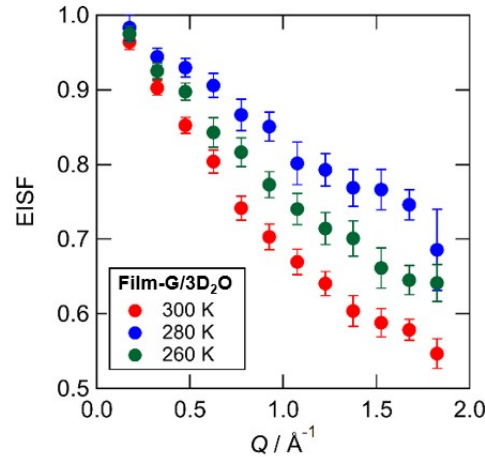

**Fig. S18.**  $Q$  dependence of the elastic incoherent structure factor (EISF) of **Film-G/3D<sub>2</sub>O** at 300, 280, and 260 K.

The QENS data of **Film-G/3H<sub>2</sub>O** was also grouped into 12 QENS profiles. The same analysis procedure was applied to these data on the condition that the parameters obtained from **Film-G/3D<sub>2</sub>O** was fixed and  $A_0$ ,  $A_3$ ,  $\Gamma_3$  were fitting parameters. A typical fitting result was shown in Fig. S19a. The QENS profile was also well reproduced. The EISF of the absorbed water corresponding to C2 in Fig. S13b ( $EISF_{(C2)}$ ) was calculated by (eq. 10) without multiplying 12 in eq.7.

$$EISF_{(C2)} = \frac{A_0(\text{Film} - G/3H_2O) - A_0(\text{Film} - G/3D_2O)}{(A_0(\text{Film} - G/3H_2O) - A_0(\text{Film} - G/3D_2O) + A_3)} \quad (\text{Eq. 10})$$

The obtained  $\Gamma_3$  and  $EISF_{(C2)}$  were shown in Fig. S19b. Although the both  $\Gamma_3$  and  $EISF_{(C2)}$  were scattered and had large error bars due to the inadequate statistics due to the increase of  $Q$  points,

the  $\Gamma_3$  values were almost constant and the  $\text{EISF}_{(C2)}$  values were approached to unity at  $Q \rightarrow 0$ , so that the observed dynamics of the absorbed water could be local mode (rotation and/or jump). The number of the mobile hydrogen atom estimated from the averaged EISF ( $0.84 \pm 0.06$ ) was  $1.9 \pm 0.7$ , which is also roughly consistent with the result in Fig. 8a.

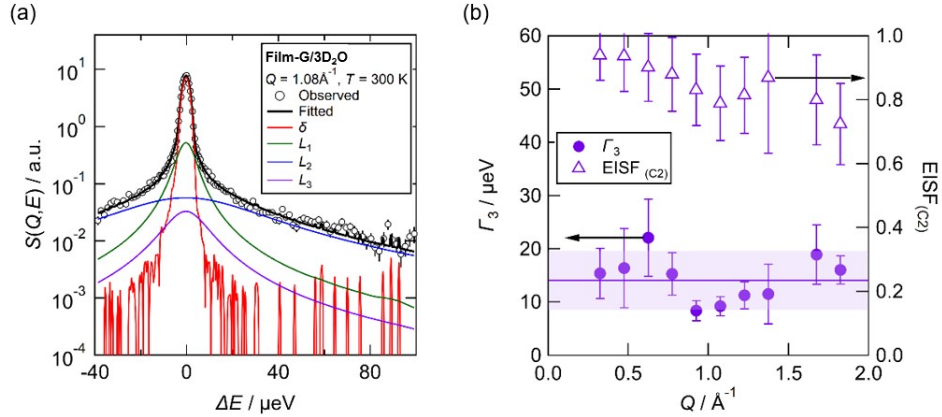

**Fig. S19.** **a**, Fitting of the 12 divided QENS profile of **Film-G/3H<sub>2</sub>O** at  $Q = 1.08 \text{ \AA}^{-1}$  at 300 K when the parameters of two Lorentzian-functions were fixed by the results of **Film-G/3D<sub>2</sub>O**. **b**, Plot of  $\Gamma_3$  and  $\text{EISF}_{(C2)}$  versus  $Q$  for **Film-G/3H<sub>2</sub>O** at 300 K.

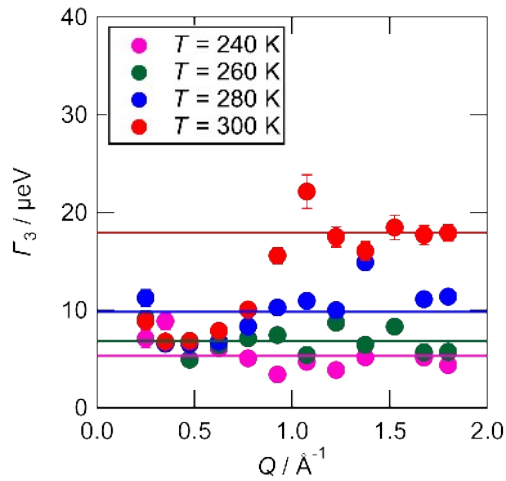

**Fig. S20.**  $Q$  dependence of  $\Gamma_3$  of **Film-G/6H<sub>2</sub>O** at various temperatures.

#### 4. References

1. T. Kobayashi, Y. Li, A. Ono, X. Zeng, T. Ichikawa, *Chem. Sci.* **10**, 6245–6253 (2019).
2. K. Shibata, N. Takahashi, Y. Kawakita, M. Matsuura, T. Yamada, T. Tominaga, W. Kambara, M. Kobayashi, Y. Inamura, T. Nakatani, K. Nakajima, M. Arai, *JPS Conf. Proc.* **8**, 036022 (2015).
3. H. Seto, S. Itoh, T. Yokoo, H. Endo, K. Nakajima, K. Shibata, R. Kajimoto, S. Ohira-Kawamura, M. Nakamura, Y. Kawakita, H. Nakagawa, T. Yamada, *Biochim. Biophys. Acta - General Subjects* **1861**, 3651–3660 (2017).
4. O. Al-Ketan, R. K. Abu Al-Rub, *Adv. Eng. Mater.* **21**, 1900524 (2019).
5. S. Prager, *J. Chem. Phys.* **33**, 122 (1960).
6. H. Yasuda, E. Lamaze, and L. D. Ikenberry, *Makromol. Chem.* **118**, 19–35 (1968).
7. S. Koter, *J. Membr. Sci.* **206**, 201–215 (2002).
8. W. Y. Hsu, J. R. Barkley, P. Meakin, *Macromolecules* **13**, 198–200 (1980).
9. B. Ghanbarian, A. G. Hunt, M. Sahimi, R. P. Ewing, T. E. Skinner, *Soil Sci. Soc. Am. J.* **77**, 1920 (2013).
10. R. G. Pearson, *J. Am. Chem. Soc.* **85**, 3533–3539 (1963).
11. H. Ohno, K. Fujita, Y. Kohno, *Phys. Chem. Chem. Phys.* **17**, 14454–14460 (2015).
12. M. Bée, *Phys. B* **182**, 323–336 (1992).
